# Supplementary material
Source: publisher figshare collection journal article supplement (https://karger.figshare.com/articles/dataset/_/14554230)
Supplement: Supplementary file 1 [file 1]

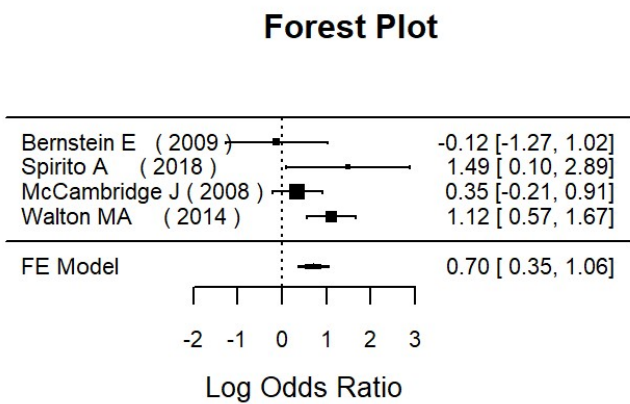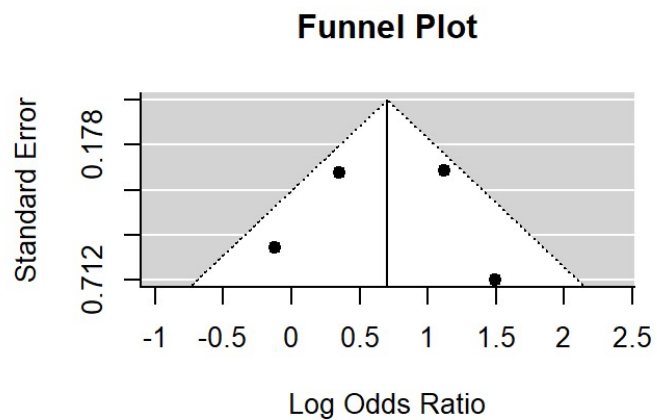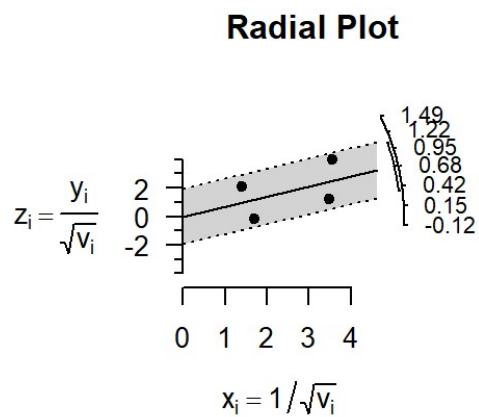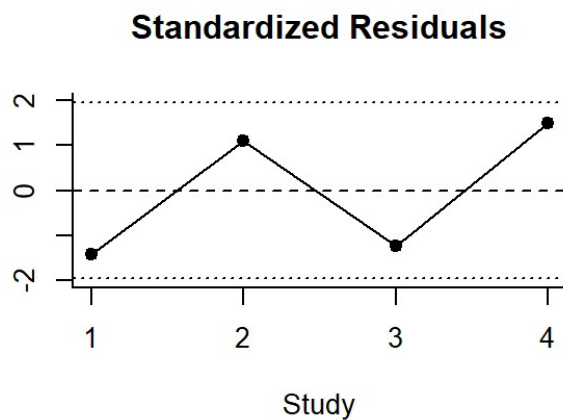

**Supplementary figure 1. Meta-analysis of impact of motivational interviewing in abstinence rates (adolescents, follow-up month 3).**
