# Supplementary material
Source: publisher figshare collection journal article supplement (https://karger.figshare.com/articles/dataset/_/14554230)
Supplement: Supplementary file 2 [file 1]

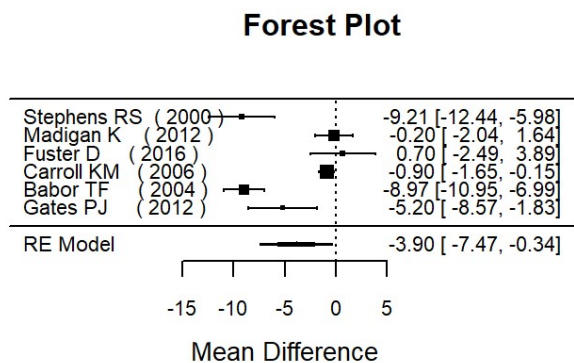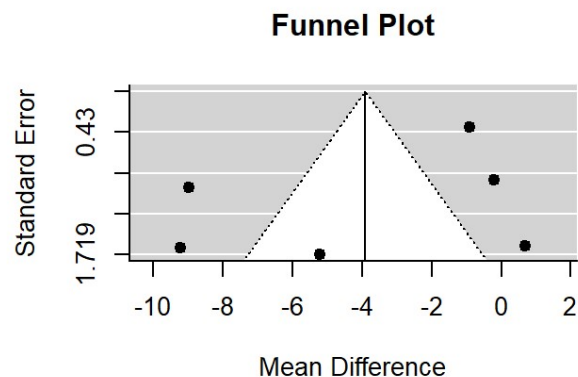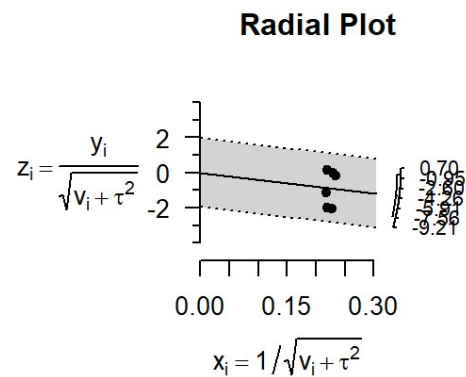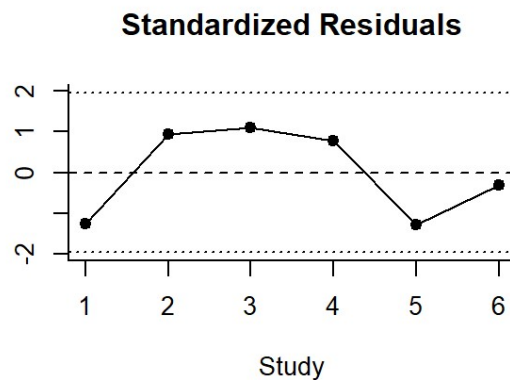

**Supplementary figure 8. Meta-analysis of impact of motivational interviewing in number of days of use last month (adults, follow-up month 3).**
