# Supplementary material
Source: publisher figshare collection journal article supplement (https://karger.figshare.com/articles/dataset/_/14554230)
Supplement: Supplementary file 4 [file 1]

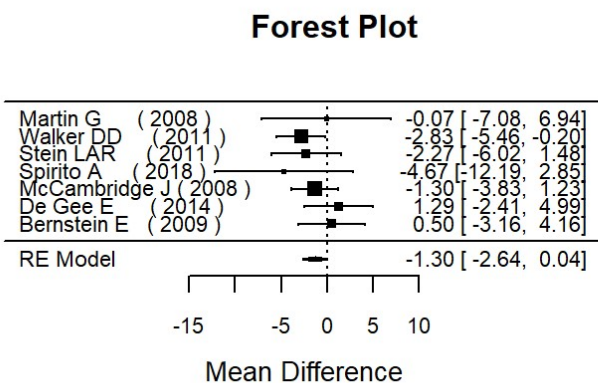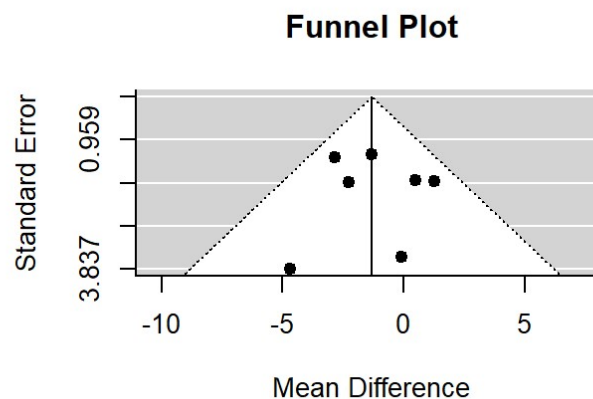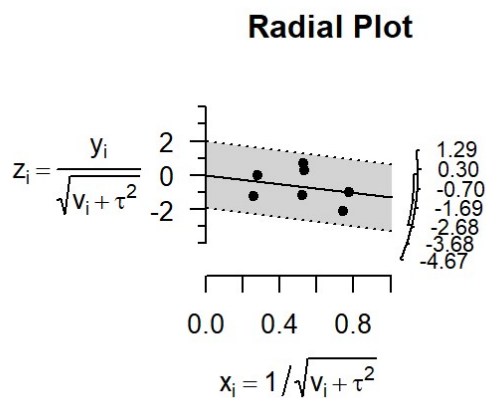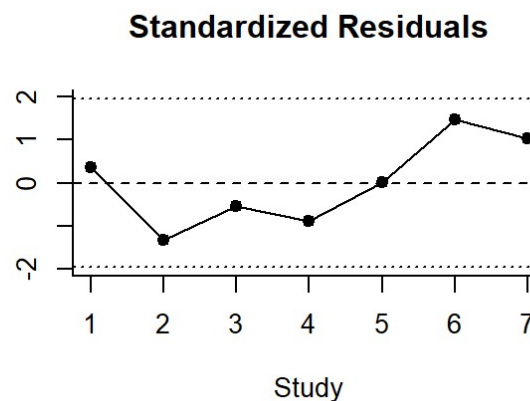

**Supplementary figure 7. Meta-analysis of impact of motivational interviewing in number of days of use last month (adolescents, follow-up month 3).**
