# Supplementary material
Source: publisher figshare collection journal article supplement (https://karger.figshare.com/articles/dataset/_/14554230)
Supplement: Supplementary file 6 [file 1]

**Forest Plot**

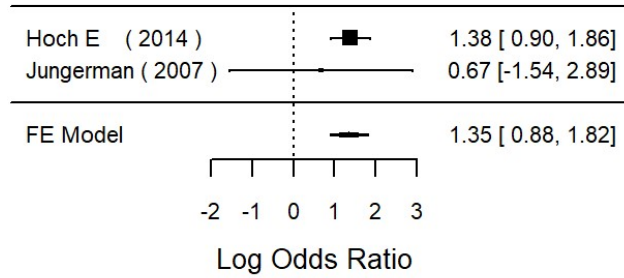

**Funnel Plot**

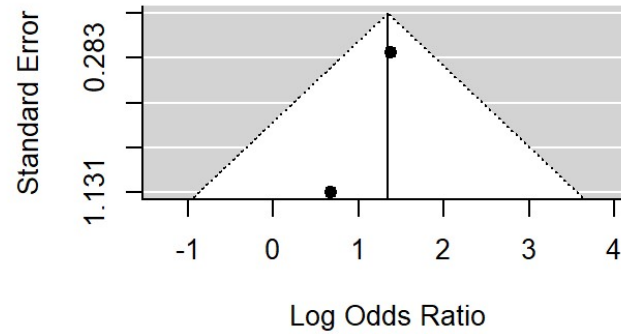

**Radial Plot**

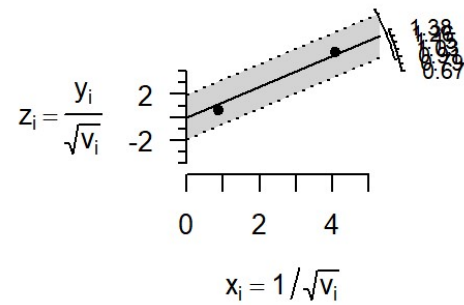

**Standardized Residuals**

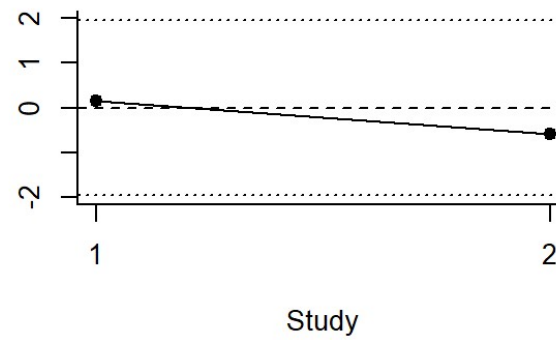

**Supplementary figure 2. Meta-analysis of impact of motivational interviewing in abstinence rates (adults, follow-up month 3).**
