# Supplementary material
Source: publisher figshare collection journal article supplement (https://karger.figshare.com/articles/dataset/_/14554230)
Supplement: Supplementary file 7 [file 1]

### Forest Plot

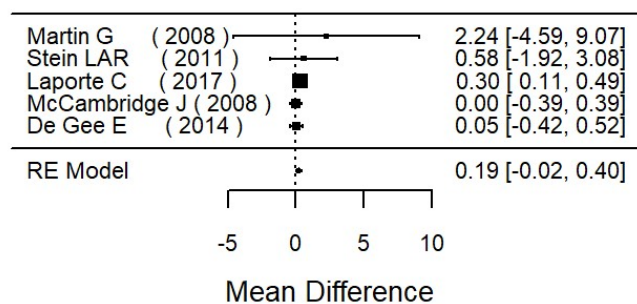

### Funnel Plot

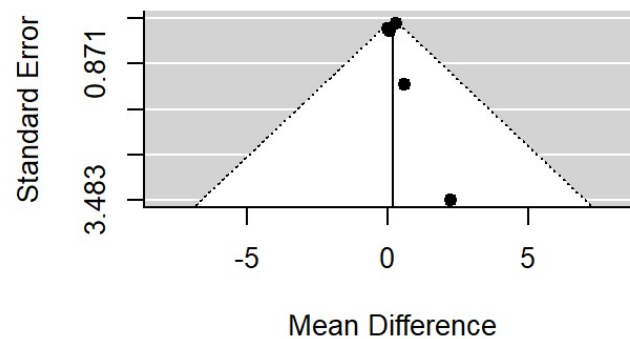

### Radial Plot

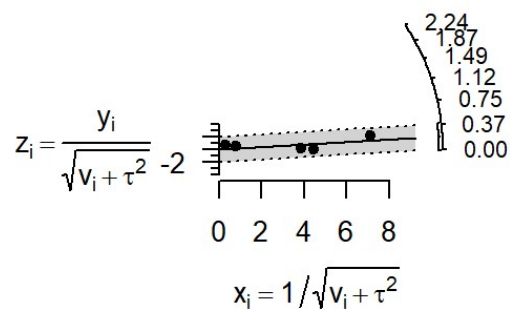

### Standardized Residuals

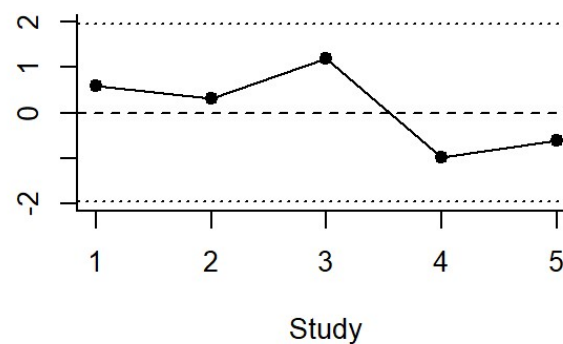

**Supplementary figure 3. Meta-analysis of impact of motivational interviewing in number of joints per day last month (adolescents, follow-up month 3).**
